# Supplementary material for: In Vitro Anticancer Activity and Structural Characterization of Ubiquinones from Antrodia cinnamomea Mycelium
Source: PubMed Central journal article supplement (PMC6154633; doi:10.3390/molecules22050747), 2017-05-06
Supplement: molecules-22-00747-s001.pdf [file molecules-22-00747-s001.pdf]

# In Vitro Anticancer Activity and Structural Characterization of Ubiquinones from *Antrodia cinnamomea* Mycelium

I-Chuan Yen <sup>1,5</sup>, Shih-Yu Lee <sup>2</sup>, Kuen-Tze Lin <sup>3</sup>, Feng-Yi Lai <sup>2</sup>, Mao-Tien Kuo <sup>4</sup>, Wen-Liang Chang <sup>5,\*</sup>

Compound **1**: antrocinnamone

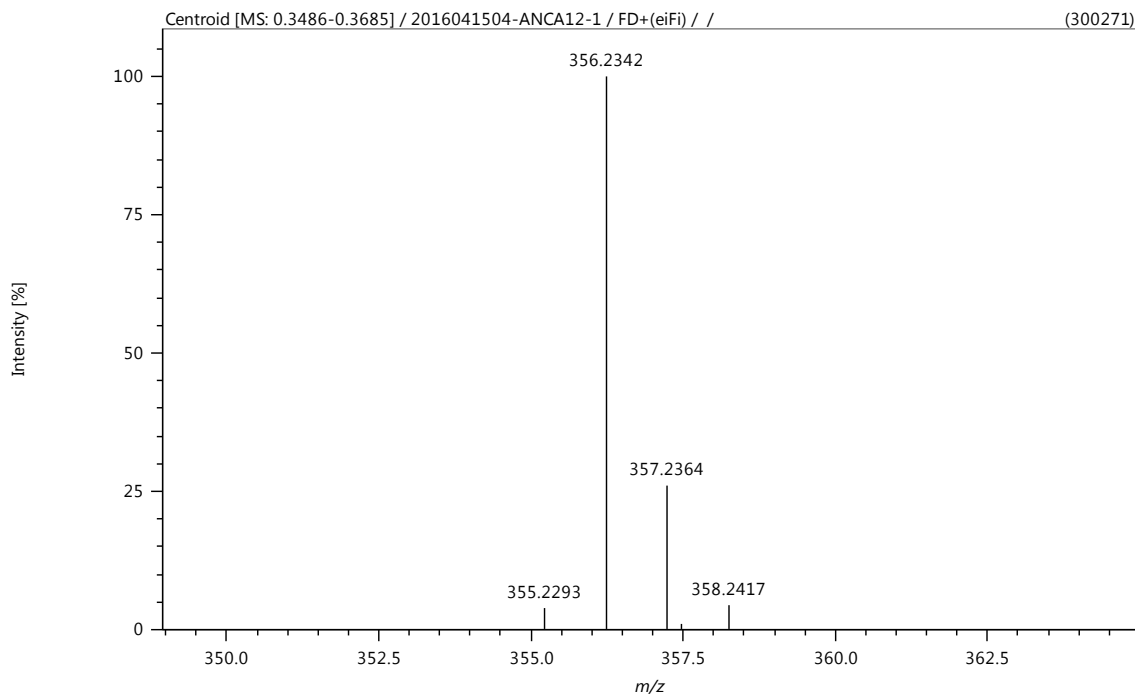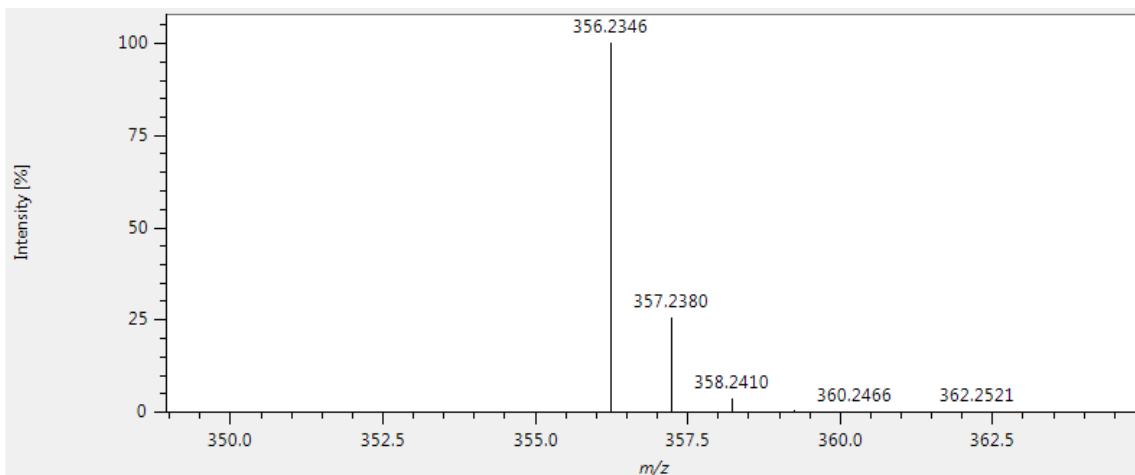

|   | Mass      | Intensity | Formula                                        | Calculated Mass | Mass Difference [mDa] | Mass Difference [ppm] | DBE |
|---|-----------|-----------|------------------------------------------------|-----------------|-----------------------|-----------------------|-----|
| ▶ | 356.23415 | 300271.46 | C <sub>23</sub> H <sub>32</sub> O <sub>3</sub> | 356.23460       | -0.44                 | -1.24                 | 8.0 |

## Compound 2: 4-acetyltrocamol LT3

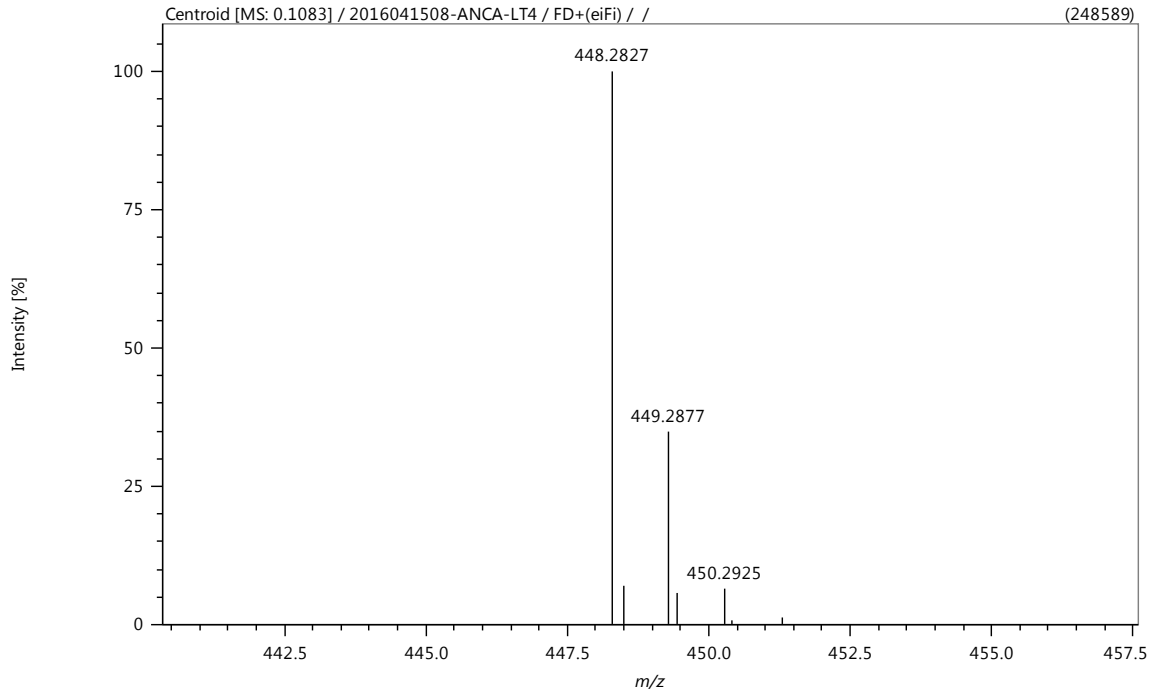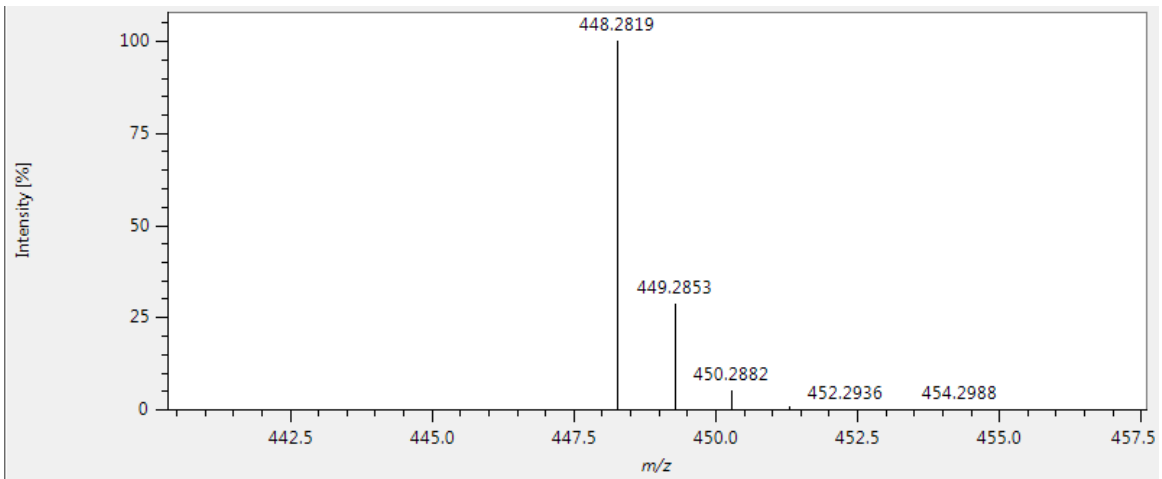

|   | Mass      | Intensity | Formula                                        | Calculated Mass | Mass Difference [mDa] | Mass Difference [ppm] | DBE |
|---|-----------|-----------|------------------------------------------------|-----------------|-----------------------|-----------------------|-----|
| ▶ | 448.28273 | 248589.00 | C <sub>26</sub> H <sub>40</sub> O <sub>6</sub> | 448.28194       | 0.79                  | 1.77                  | 7.0 |
